# Supplementary material
Source: PubMed Central journal article supplement (PMC4800818)
Supplement: NIHMS760559-supplement-appendix.pdf [file NIHMS760559-supplement-appendix.pdf]

# THE LANCET Psychiatry

## Supplementary appendix

This appendix formed part of the original submission and has been peer reviewed. We post it as supplied by the authors.

Supplement to: Postpartum Depression: Action Towards Causes and Treatment (PACT) Consortium. Heterogeneity of postpartum depression: a latent class analysis. *Lancet Psychiatry* 2014; published online Dec 22. [http://dx.doi.org/10.1016/S2215-0366\(14\)00055-8](http://dx.doi.org/10.1016/S2215-0366(14)00055-8).

# PACT Supplementary Material

## PACT Supplement Table 1

### Study Site Locations, Collaborators, Design and Records Submitted

| Country                                                              | Institution                  | Collaborators                                    | Study Designs Submitted | Records Submitted |
|----------------------------------------------------------------------|------------------------------|--------------------------------------------------|-------------------------|-------------------|
| Australia                                                            | U of Melbourne               | Buist, A., Bilszta, J. *                         | Prospective             | Single            |
| France                                                               | Univ of Paris                | Apter, G., Devouche, E.                          | Prospective             | Repeated          |
| Sweden                                                               | Karolinska                   | Magnusson, P., Lichtenstein, P.                  | Retrospective           | Single            |
| The Netherlands                                                      | Erasmus                      | Bergink, V.                                      | Prospective             | Single            |
| The Netherlands                                                      | VU University Medical Center | Penninx, B.                                      | Retrospective           | Single            |
| The Netherlands                                                      | Erasmus MC                   | Roza, S.                                         | Prospective             | Single            |
| UK                                                                   | Cardiff                      | Jones, I.                                        | Retrospective           | Repeated          |
| USA                                                                  | Cornell                      | Altemus, M.                                      | Retrospective           | Single            |
| USA                                                                  | U Mass                       | Deligiannidis, K.                                | Prospective             | Single            |
| USA                                                                  | U Penn                       | Epperson, N.C., Kim, D.                          | Prospective             | Single            |
| USA                                                                  | Medical U of South Carolina  | Guille, C.                                       | Prospective             | Single            |
| USA                                                                  | UNC                          | Meltzer-Brody, S., Sullivan, P.F., Rubinow, D. * | Prospective             | Repeated          |
| USA                                                                  | Iowa                         | O'Hara, M., Stuart, S., Brock, R. L. *           | Mixed                   | Repeated          |
| USA                                                                  | Hopkins                      | Payne, J.                                        | Prospective             | Single            |
| USA                                                                  | U of Rochester               | Robertson-Blackmore, E.                          | Prospective             | Repeated          |
| USA                                                                  | NIH/NIMH                     | Schmidt, P., Martinez, P. *                      | Mixed                   | Single            |
| USA                                                                  | Brown                        | Sharkey, K.                                      | Prospective             | Repeated          |
| USA                                                                  | U of Arkansas/Emory          | Stowe, Z., Newport, J.                           | Prospective             | Repeated          |
| USA                                                                  | Northwestern (Pittsburgh)    | Wisner, K., Heather, E., Dills, J.L., Sit, D. *  | Prospective             | Repeated          |
| USA                                                                  | UNC                          | Putnam, K.T. Biostatistician                     |                         |                   |
| Denmark                                                              | Aarhus University            | Munk-Olsen, T. Epidemiologist                    |                         |                   |
|                                                                      |                              |                                                  |                         |                   |
| * Data submitted included study participants across multiple cohorts |                              |                                                  |                         |                   |

## PACT Supplement Table 2

### Enrollment Period, Recruitment Setting, Assessment Measures, PPD Criteria and Past Psychiatric History across Sites

| Country                                                                                                                                                                       | Site PI                | Time of Study Enrollment    | Recruitment Setting                                                   | Depression Assessment Measure                                                                                                                | Structured Clinical Interview     | Site Criteria for PPD Dx                                                                                           | Past Psychiatric History of MDE or Anxiety |
|-------------------------------------------------------------------------------------------------------------------------------------------------------------------------------|------------------------|-----------------------------|-----------------------------------------------------------------------|----------------------------------------------------------------------------------------------------------------------------------------------|-----------------------------------|--------------------------------------------------------------------------------------------------------------------|--------------------------------------------|
| Australia                                                                                                                                                                     | Buist, A               | prior and during PPD        | MBU                                                                   | HAM-D                                                                                                                                        | SCID                              | DSM-IV for major depression                                                                                        | yes - self-report                          |
| France                                                                                                                                                                        | Apter, G               | prior, during and after PPD | Multiple                                                              | EPDS (French validated)                                                                                                                      | MADRS (French validated)          | EPDS > 11                                                                                                          | yes - interview and self-report            |
| Sweden                                                                                                                                                                        | Magnusson, P           | after PPD                   | Swedish Twin Community                                                | EPDS (Swedish)                                                                                                                               | CIDI                              | EPDS definition                                                                                                    | yes self report                            |
| The Netherlands                                                                                                                                                               | Bergink, V             | during and after PPD        | Psychiatric clinic                                                    | EPDS (Dutch), Hamilton                                                                                                                       | SCID                              | EPDS > 13                                                                                                          | yes I interview and self report            |
| The Netherlands                                                                                                                                                               | Penninx, B             | prior, during and after PPD | Psychiatric clinic, community, multiple                               | L-EPDS <sup>1</sup> (Dutch)                                                                                                                  | CIDI                              | EPDS > 12                                                                                                          | yes - interview and self-report - CIDI     |
| The Netherlands                                                                                                                                                               | Rosa, S                | prior to PPD                | Community                                                             | L-EPDS <sup>1</sup> (Dutch)                                                                                                                  | None                              | EPDS > 12                                                                                                          | no                                         |
| UK                                                                                                                                                                            | Jones, I               | after PPD                   | Multiple                                                              | Site specific diagnostic instrument                                                                                                          | SCAN                              | DSM IV                                                                                                             | yes- SCAN, Clinical interview              |
| USA                                                                                                                                                                           | Altemus, M             | during and after PPD        | Psychiatric clinic                                                    | N/A                                                                                                                                          | None                              | DSM                                                                                                                | yes - clinical interview x                 |
| USA                                                                                                                                                                           | Deligiannidis, K       | prior to PPD                | obstetric clinic                                                      | EPDS (English); quick inventory depressive symptoms self report (QIDS-SR)                                                                    | SCID/MINI                         | used diagnostic interview                                                                                          | yes-clinical interview and self-report     |
| USA                                                                                                                                                                           | Epperson, N            | prior to PPD                | Obstetric clinic, Community, Advertised                               | EPDS (English)                                                                                                                               | CDS (mood module)                 | EPDS ≥ 10                                                                                                          | yes - self-report                          |
| USA                                                                                                                                                                           | Guille, C              | prior to PPD                | Obstetric clinic                                                      | EPDS (English)                                                                                                                               | None                              | EPDS ≥ 10                                                                                                          | yes- self report                           |
| USA                                                                                                                                                                           | Meltzer-Brody, S       | prior, during and after PPD | Multiple, Psychiatric clinic, Obstetric Clinic, Community, Advertized | EPDS (English) - all, PHQ some                                                                                                               | SCID/MINI                         | EPDS > 12                                                                                                          | yes - interview and self-report            |
| USA                                                                                                                                                                           | O'Hara, M              | prior and during PPD        | Multiple                                                              | EPDS (English), PHQ, Hamilton                                                                                                                | SCID                              | SCID diagnosis                                                                                                     | yes - clinical interview                   |
| USA                                                                                                                                                                           | Payne, J               | prior to PPD                | Multiple                                                              | EPDS (English), IDS-SR, MADRS                                                                                                                | SCID                              | DSM-IV major depressive episode & clearly began postpartum                                                         | yes - interview and self-report            |
| USA                                                                                                                                                                           | Robertson-Blackmore, E | prior to PPD                | Obstetric clinic                                                      | EPDS (English)                                                                                                                               | SCID (mood module)                | Narrow definition SCID diagnosis of major, minor or depression NOS at 6 weeks postpartum. Broader within 6 months. | yes - interview and self-report            |
| USA                                                                                                                                                                           | Schmidt, P             | during and after PPD        | Multiple, Advertized                                                  | EPDS (English), CES-D, BDI, Hamilton                                                                                                         | SCID                              | SCID diagnosis                                                                                                     | yes - clinical interview                   |
| USA                                                                                                                                                                           | Sharkey, K             | prior to PPD                | Psychiatric clinic, Obstetric Clinic, Community, Advertized, Multiple | Hamilton, Inventory of Depressive Symptomatology, also measuring manic symptoms with the Highs questionnaire and the Beck-Rafelson interview | SCID, at 16 weeks also the LIFE   | HAM-D > 13, IDS-SR-25                                                                                              | yes - interview and self-report            |
| USA                                                                                                                                                                           | Stowe, Z               | prior to PPD                | Multiple, Clinic sample                                               | EPDS (English) - on 40%, BDI, Hamilton                                                                                                       | SCID (mood module), SCID lifetime |                                                                                                                    | yes - interview and self-report            |
| USA                                                                                                                                                                           | Wisner, K              | prior and during PPD        | Multiple                                                              | EPDS (English), SIGHADS, Hamilton                                                                                                            | SCID                              | SIGHADS score of ≥18, HRSD ≥15                                                                                     | yes - clinical interview                   |
| The EPDS-Lifetime: assessment of lifetime prevalence and risk factors for perinatal depression in a large cohort of depressed women.                                          |                        |                             |                                                                       |                                                                                                                                              |                                   |                                                                                                                    |                                            |
| Meltzer-Brody S, Boschloo L, Jones I, Sullivan PF, Penninx BW. Arch Womens Ment Health. 2013 Dec;16(6):465-73. doi: 10.1007/s00737-013-0372-9. Epub 2013 Aug 1. PMID:23904137 |                        |                             |                                                                       |                                                                                                                                              |                                   |                                                                                                                    |                                            |

## **PACT Phenotypic Site Survey**

After signing the memo of understanding a survey was distributed to each site to learn what types of studies and variables were available for submission. The survey was developed by the PACT Phenotype Committee comprised of PIs from 9 sites. The survey included questions about recruitment, depression assessment measures and timing, the types of structured clinical interview used, criteria for PPD diagnosis, availability of psychiatric and medication histories, pregnancy and obstetric complications and if biological samples were collected. These data were synthesized to create the data codebook questions.

## **PACT Codebook**

The Phenotype Committee next created a listing of variables and questions areas to collect the available data from PACT sites. The questions were divided into nine sections. The nine sections corresponded with nine electronic excel templates for data submission. Each site sent in de-identified data that corresponded with the PACT Codebook question item. Many sites did not have existent data for all the variables requested.

The PACT codebook contained nine sections with a total of 122 questions that collected de-identified subject information on the following: 1) site identification, study design, case definition and assessment period; 2) demographic information; 3) obstetric, delivery, breast feeding and offspring history/parity; 4) perinatal depression episode status (PND), PND history, family history of psychiatric illness/mood disorders and PND, and trauma history; 5) EPDS score/items; 6) SCID or SCAN mood module individual items; 7) SCID interview summary items; 8) HAM-D items; and 9) medication and treatment history.

Section 1 was site identification, study design and case definition. Data were coded as prospective or retrospective as well as single or repeated time assessments submitted. Section 2 collected de-identified demographic information that included the age of mom at first assessment submitted, marital status, race/ethnicity, education of mom, form of health care insurance, low income status, employment of mom during pregnancy as well as during the postpartum period and the Global Assessment Functioning Score. Section 3 was the Obstetric, Delivery, Breast Feeding and Off Spring History that included collection of gestation weeks at delivery, gravidity, parity for living, nonliving and miscarriages, if the pregnancy was planned, were assisted reproductive technology options used, smoking during pregnancy, alcohol during pregnancy, antiemetic or opiates medicines, gestational onset, hypertension, maternal obesity (BMI GE 30) pre-eclampsia, gestational onset diabetes, high risk pregnancy due to maternal medical condition, fetal stress, postpartum hemorrhage, premature rupture of membranes (PROM), type of delivery (vaginal, caesarean or unknown). Breastfeeding, birth defect (major), low birth weight, number of delivery births, hospital care (nursery mom/NICU/unknown). Section 4 coded for the Perinatal Depression Episode (PND), PND History, Family History and Trauma History items that included PPD onset timing and previous history, family history of PPD or other DSM diagnoses, childhood sexual, physical or other trauma. The PPD onset was based on patient reports and time of assessment in the parent study. The phenotype committee defined PPD onset timing levels and each site selected the appropriate timing onset category from the defined choices listed in the codebook to describe their study. The information submitted by each site was derived from patient report and timing of assessments in the parent study. Section 5 coded for the 10 EPDS individual items and total score. Section 6 coded the SCID Mood Module individual items. Section 7 coded the SCID Diagnosis Summary items. Section 8 coded the Hamilton Depression Rating total score. Section 9 coded Medication and Treatment History items that included antenatal and postpartum usage of any anti-depressant, anti-anxiety/hypnotics, anti-psychotics, PPD psychotherapy or a PPD psychiatric admission.

## **Latent Class Analyses (LCA)**

Data analyses of the aggregated PACT records were conducted for a 2 tier analysis plan. LCA is a useful tool to identify mutually exclusive classes based on profiles of multiple variables. Subjects within both tiers were unique subjects with a post birth rating. There was overlap of the subjects between tiers and missing data were largely due to the fact the measure was not originally collected in the parent study. There were a total of 2537 subjects that were included in both Tier 1 and Tier 2 LCAs. In Tier 1, 39% of the subjects were part of Tier 2. In Tier 2, 57% of subjects were included in Tier 1. For cases having multiple ratings submitted, the most severe depression rating was selected. In this paper, Tier 1 LCA utilized complete (no missing data) EPDS records. Class membership was assigned based on the 10 EPDS questions with follow up validation analyses on categorical phenotypic variables detailed below. Given that inclusion criteria was singularly determined by having a complete EPDS rating, many of the cases did not collect data on the validation variables. Tier 1 validation analyses used the EPDS 10 question class assigned membership to quantify additional phenotypic values and percentages for the EPDS total, EPDS anxiety subscale, pregnancy and obstetric complications, psychiatric history of major depression or anxiety data available. Chi-square statistics tested the significance of the latent class for each validation variable and are found in Table 3. Tier 2 LCA analyses were conducted to examine a wider range of clinical data about severity and to include sites not submitting the 10 question EPDS item scores. Tier 2 analyses were restricted to cases meeting a strict case definition of PPD. The EPDS total score and anxiety subscale were indicator variables not the individual EPDS items.

Using Mplus 7.2 mixture model methods, ordinal, categorical and continuous were subjected to LCA. Given the wide range of studies aggregated the data were not imputed. Mplus estimated the model parameters individually prior to using the full information by maximum likelihood. Both Tiers utilized the step up LCA procedure meaning that the initial models were run having a single class and the number of classes were increased stepwise if the model converged and The Vuong-Lo-Mendell-Rubin likelihood ratio supported additional classes. The assumption of conditional independence addresses the correlations among observed variables in the model and deviation is assessed by examination of bivariate residuals of the indicator variables. Examination of entropy, BIC, AIC, and bivariate residuals along with the clinical meaningfulness of the classes were used for final model selection. Sensitivity/specificity analyses were conducted to assess if the class memberships held through forward inclusion of each of the indicator variables separately. The results held up across the multiple iterations. The model estimation terminated normally in both Tiers. Mplus analyses report if the model estimation terminated normally as part of the default output. Terminated normally can be defined as the final estimates outputted being not affected by problems that arose in LCA that include: 1) the residual covariance matrix contained a negative residual variance, 2) a correlation greater than one was reported among indicator variables, or 3) that local dependencies among the variables existed. A Mplus message that the model estimation did not terminate normally noting the above warnings indicates that additional TECH reports are needed to track down what influences the indicator variables are having on the model estimation for accurate results. Mplus Mixture model and other model syntax are located online along with a very informative FAQ detailing syntax and modeling questions. <http://www.statmodel.com/examples/>

## **LCA Categorical Variables Definitions**

For Tier 1 validation and Tier 2 LCA analyses the following categorical variables were created and utilized. Measures were selected for commonality among sites and clinical importance recommended by the Phenotype Committee. PPD status\_for inclusion in Tier 2 LCA2 were unique subjects having either an EPDS total minimum score of 10 or a minimum Hamilton 17 item score of 8 or a clinical interview that quantified depression severity. Minor depression was defined as having an EPDS total score 10-11 or Hamilton score of 8-17. Major depression was defined as an EPDS total score of at least 12 and Hamilton score equaling 18 or higher. EPDS total score was included in the Tier 2 model to include sites that only provided an EPDS total score and not the ten individual item scores. OB Complications\_included endorsement of any one of the five items for fetal stress, postpartum hemorrhage, PROM, delivery type, low birth weight. Pregnancy Complications included endorsement of any one of the five items for

gestational hypertension, maternal obesity, pre-eclampsia, gestation diabetes and high risk pregnancy status. Birth Defects included endorsement of a birth defect. Gravidity was converted to a binary yes/no variable. Anxiety diagnoses included endorsement of any one or more of the following DSM-IV lifetime diagnoses: GAD, Panic, Agoraphobia, PTSD, Social Phobia, Specific Phobia, Anxiety NOS, and Obsessive Compulsive. Mood diagnoses included endorsement of any one or more of the following DSM-IV lifetime diagnoses: PPD, Major Depressive Disorder, Depression NOS and Dysthymia. Co-Morbidity for Depression and Anxiety disorders included endorsement of one or more mood and one or more anxiety diagnoses.

### Demographic Characteristics Among LCA2 Latent Classes

| Demographic Variables<br>N=4245           |                 | Class 1<br>N=759 18% | Class 2<br>N=2099 49% | Class 3<br>N=1387 33% | Chi_Sq                     |
|-------------------------------------------|-----------------|----------------------|-----------------------|-----------------------|----------------------------|
| Race                                      | % white         | 73.2                 | 81.6                  | 81.4                  | $\chi^2_4 = 29.9$ p<.0001  |
|                                           | % AA            | 19.9                 | 13.8                  | 12.0                  |                            |
|                                           | % other         | 6.9                  | 4.6                   | 6.6                   |                            |
| Education                                 | % HS or less    | 48.2                 | 61.4                  | 32.1                  | $\chi^2_4 = 253.3$ p<.0001 |
|                                           | % college       | 34.3                 | 29.2                  | 43.3                  |                            |
|                                           | % prof/grad     | 17.5                 | 9.4                   | 24.6                  |                            |
| Marital status                            | % married/cohab | 82.4                 | 78.0                  | 80.6                  | $\chi^2_2 = 6.9$ p=0.03    |
|                                           | % single/alone  | 17.6                 | 22.0                  | 19.4                  |                            |
| Low Income proxy<br>-gov/state assistance | % no            | 78.2                 | 73.3                  | 48.0                  | $\chi^2_2 = 26.2$ p<.0001  |
|                                           | % yes           | 21.8                 | 26.7                  | 52.0                  |                            |
| Design                                    | prospective     | 71.9                 | 51.2                  | 70.8                  | $\chi^2_2 = 173.1$ p<.0001 |
|                                           | retrospective   | 28.1                 | 48.8                  | 29.2                  |                            |

### Demographic Characteristics for PACT Sample

| PACT Unique Subjects<br>Demographic Variables |                 | N=17912 |
|-----------------------------------------------|-----------------|---------|
| Race                                          | % white         | 78.3    |
|                                               | % AA            | 15.7    |
|                                               | % other         | 6.0     |
| Education                                     | % HS or less    | 56.1    |
|                                               | % college       | 28.4    |
|                                               | % prof/grad     | 15.5    |
| Marital status                                | % married/cohab | 83.2    |
|                                               | % single/alone  | 16.8    |
| Low Income proxy<br>-gov/state assistance     | % no            | 86.6    |
|                                               | % yes           | 13.4    |
| Design                                        | prospective     | 46.5    |
|                                               | retrospective   | 53.4    |

Tier 1 LCA1 EPDS Total Scores by Site

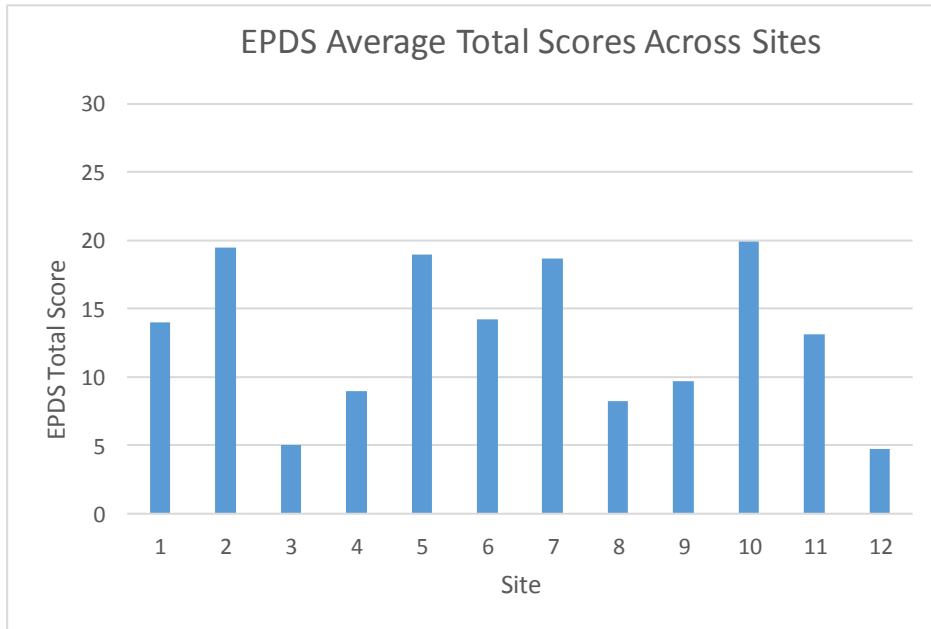

Tier 1 LCA1 EPDS Item Response Probabilities by Site

**EPDS Item Response Probabilities By Site**

Tier 1 EPDS Item Response Probabilities by Site

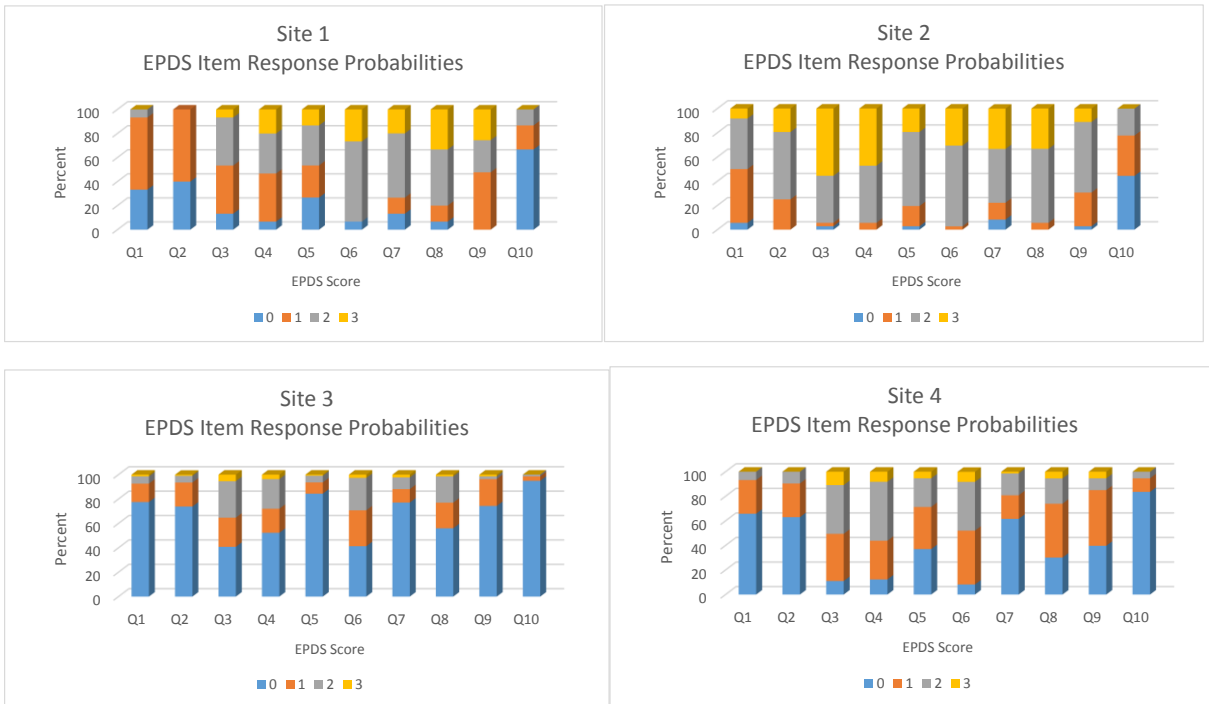

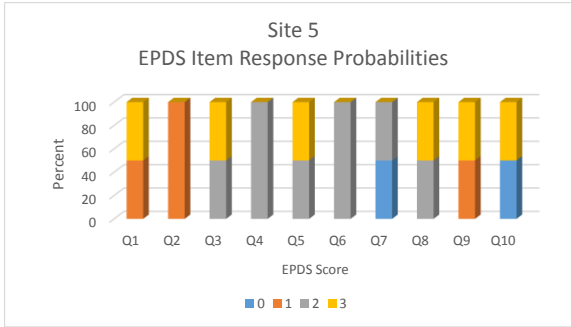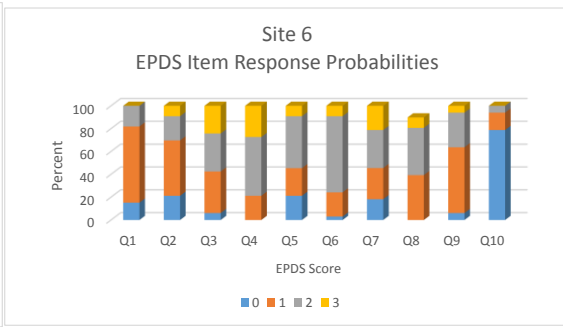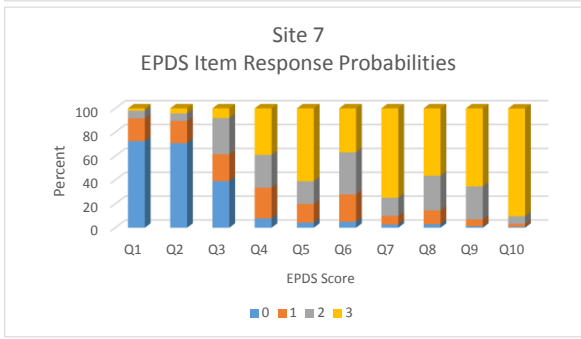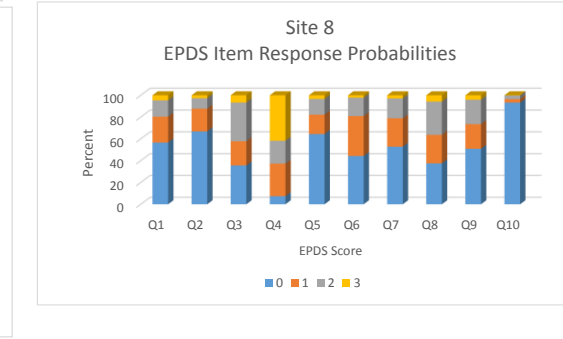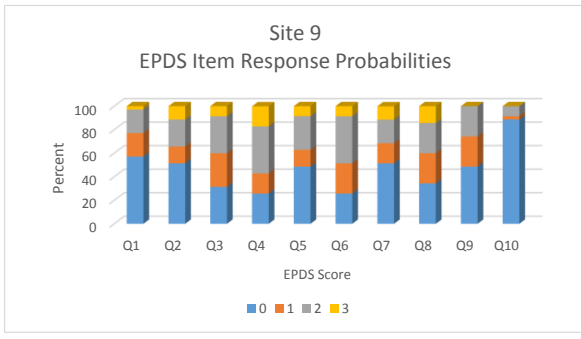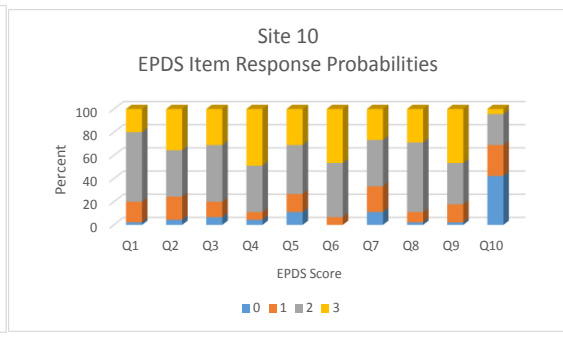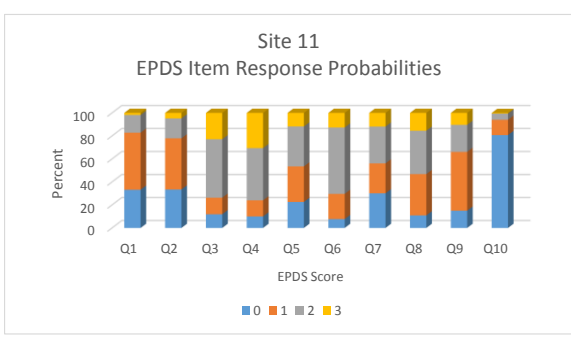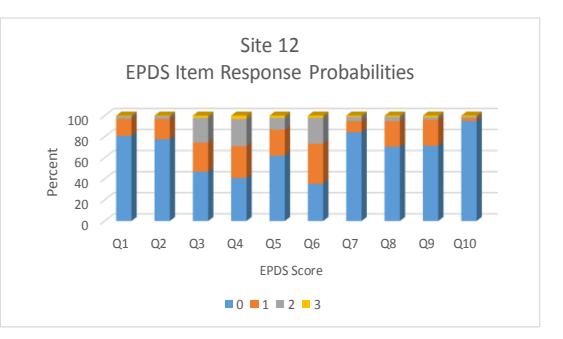

Note: The sample sizes are not consistent across sites

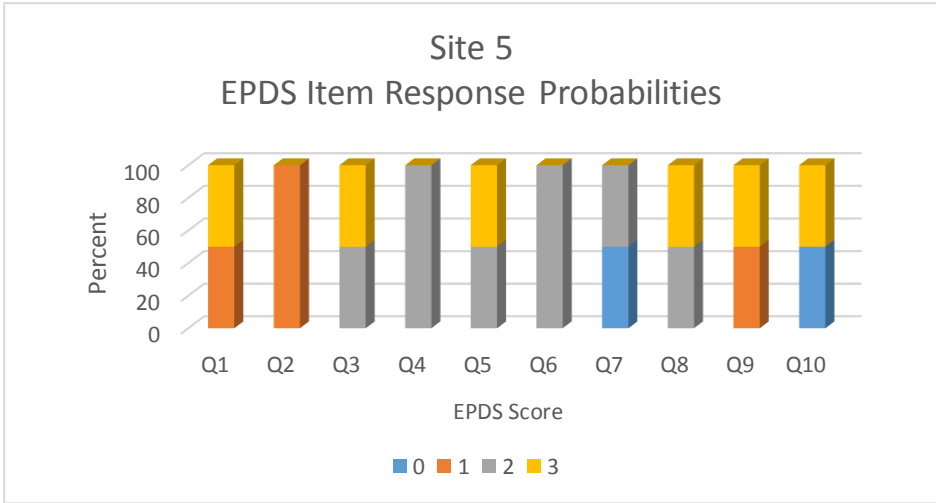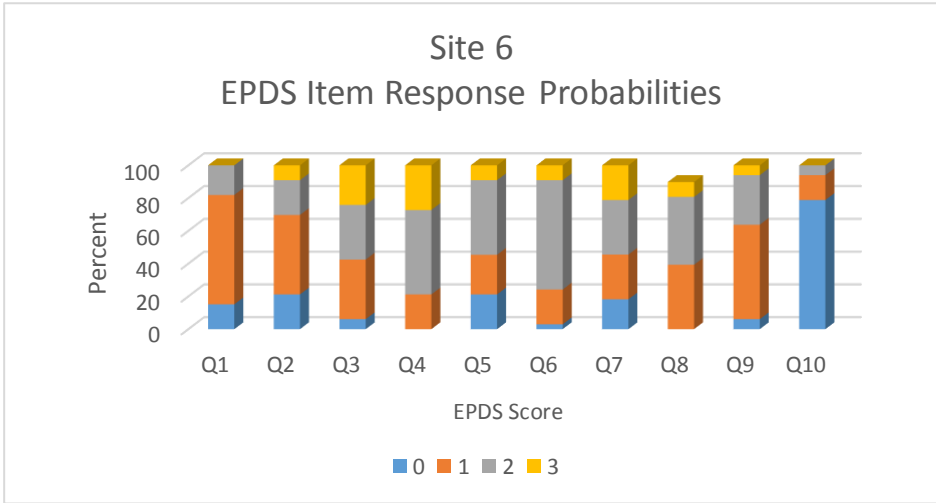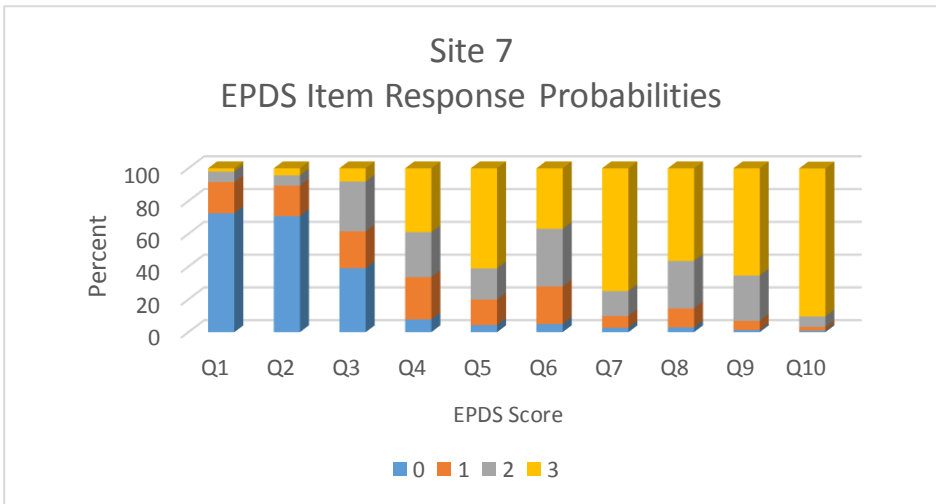



Site 8  
EPDS Item Response Probabilities

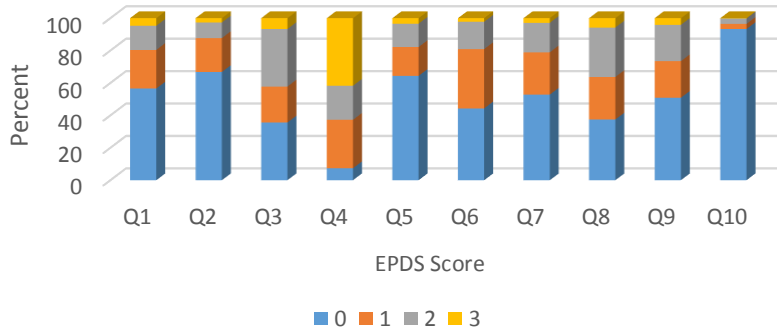

Site 9  
EPDS Item Response Probabilities

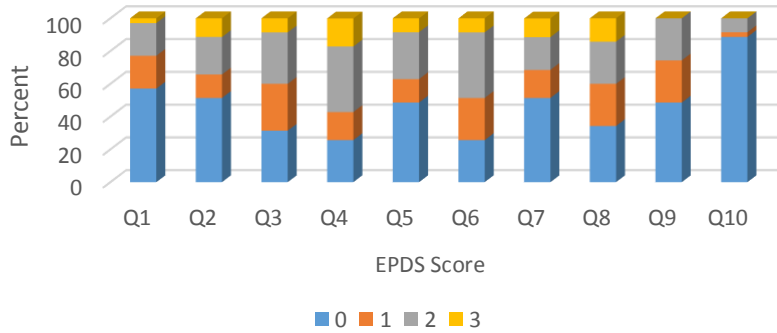

Site 10  
EPDS Item Response Probabilities

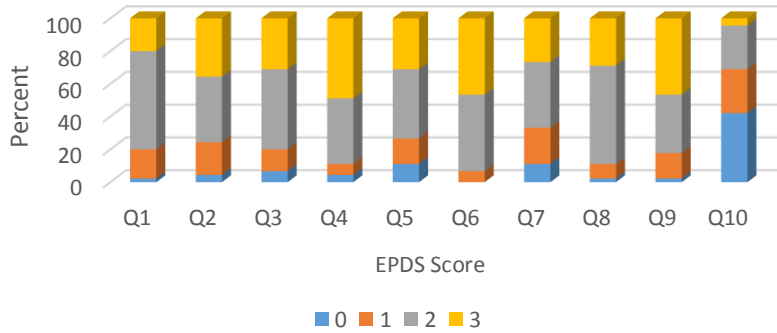

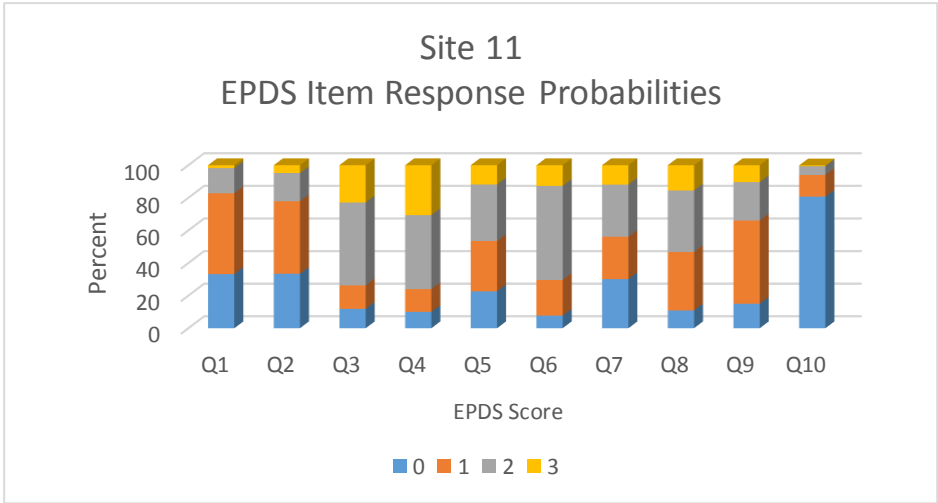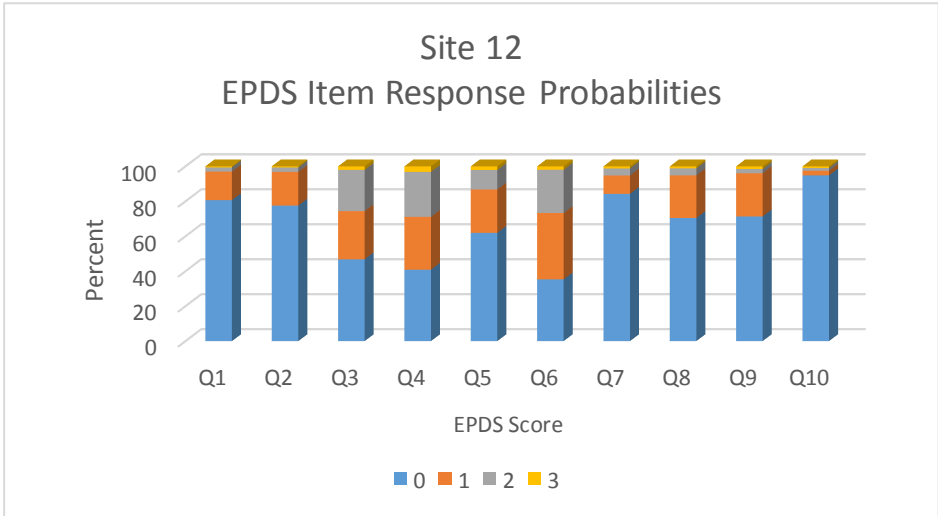

Note: Sample sizes are not consistent across sites.
